# Supplementary material for: THE EFFECTS OF POLARIZATION ON DIFFUSION DESCRIPTIONS OF RADIATIVE TRANSFER.
Source: Springer Nature journal article supplement (doi:10.1186/s12879-024-09261-9), 1969-01-01

**Additional file 6**

**Table S3: Gene expression of S.aureus upon using monolaurin at sub-MICs concentrations:**

| <b>Sample ID.</b>                      | <b>Sample No.</b> | <b><i>blaZ</i></b> | <b><i>16S rRNA</i></b> | <b>Fold change</b> | <b>Fold change reduction</b> | <b>%*</b>    |
|----------------------------------------|-------------------|--------------------|------------------------|--------------------|------------------------------|--------------|
| ST1(control)                           | 1A                | 20.15              | 21.08                  | -                  | -                            | -            |
| ST1(Treated with 250µg/ml monolaurin)  | 1B                | 19.72              | 21.32                  | 0.6285             | 0.3715                       | <b>37.15</b> |
| ST1 (Treated with 500µg/ml monolaurin) | 1C                | 20.11              | 22.85                  | 0.2852             | 0.7148                       | <b>71.48</b> |
| ST2 (control)                          | 2A                | 19.47              | 22.19                  | -                  | -                            | -            |
| ST2(Treated with 250µg/ml monolaurin)  | 2B                | 18.54              | 22.09                  | 0.5625             | 0.4375                       | <b>43.75</b> |
| ST2(Treated with 500µg/ml monolaurin)  | 2C                | 19.62              | 25.10                  | 0.1476             | 0.8524                       | <b>85.24</b> |
| monolaurin)                            |                   |                    |                        |                    |                              |              |
| ST3(control)                           | 3A                | 19.51              | 22.03                  | -                  | -                            | -            |
| ST3(Treated with 250µg/ml monolaurin)  | 3B                | 19.70              | 23.17                  | 0.5176             | 0.4824                       | <b>48.24</b> |
| ST3(Treated with 500µg/ml monolaurin)  | 3C                | 18.33              | 23.12                  | 0.2073             | 0.7927                       | <b>79.27</b> |
| ST4(control)                           | 4A                | 19.30              | 21.74                  | -                  | -                            | -            |
| ST4(Treated with 250µg/ml monolaurin)  | 4B                | 20.19              | 23.55                  | 0.5285             | 0.4715                       | <b>47.15</b> |

|                                       |    |       |       |        |        |              |
|---------------------------------------|----|-------|-------|--------|--------|--------------|
| ST4(Treated with 500µg/ml monolaurin) | 4C | 21.41 | 26.92 | 0.1191 | 0.8809 | <b>88.09</b> |
|---------------------------------------|----|-------|-------|--------|--------|--------------|

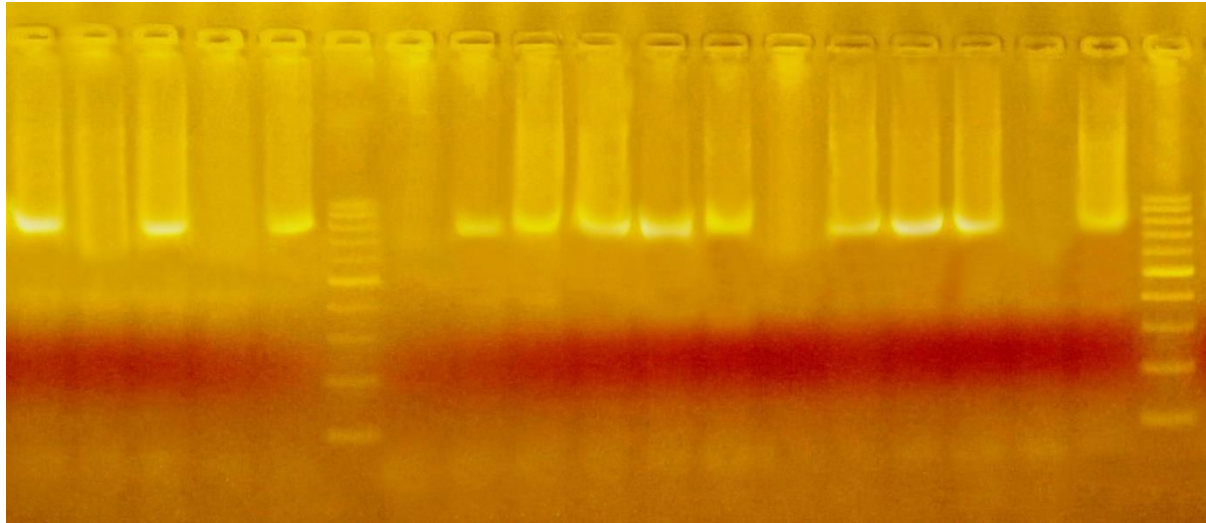

Supplement: MOESM6 [file 26955898]
