# Supplementary material for: THE EFFECTS OF POLARIZATION ON DIFFUSION DESCRIPTIONS OF RADIATIVE TRANSFER.
Source: Springer Nature journal article supplement (doi:10.1186/s12879-024-09261-9), 1969-01-01
Supplement: MOESM1 [file 26955898]

**Additional file 1**

**Table S1: Distribution of MRSA and MSSA in different clinical Specimens**

| Type of infection               |                            | <i>S. aureus</i> isolates |              |      |             |
|---------------------------------|----------------------------|---------------------------|--------------|------|-------------|
|                                 |                            | MRSA                      |              | MSSA |             |
|                                 |                            | No                        | %*           | No   | %*          |
| <b>Wound infections</b>         | Surgical wound             | 42                        | <b>36.52</b> | 4    | <b>3.48</b> |
|                                 | Accidental wound infection | 21                        | <b>18.26</b> | 2    | <b>1.74</b> |
|                                 | Ulcers& Abscess            | 11                        | <b>9.56</b>  | 2    | <b>1.74</b> |
| <b>Burns</b>                    |                            | 21                        | <b>18.26</b> | 3    | <b>2.61</b> |
| <b>Blood</b>                    |                            | 2                         | <b>1.74</b>  | 1    | <b>0.87</b> |
| <b>Urinary tract infections</b> |                            | 3                         | <b>2.61</b>  | 0    | <b>0</b>    |
| <b>Chest infections</b>         |                            | 3                         | <b>2.61</b>  | 0    | <b>0</b>    |
| <b>Total</b>                    |                            | 103                       | <b>89.6</b>  | 12   | <b>10.4</b> |

**%\* correlate to total no. of *S.aureus* isolates (n=115)**
