# Supplementary material for: THE EFFECTS OF POLARIZATION ON DIFFUSION DESCRIPTIONS OF RADIATIVE TRANSFER.
Source: Springer Nature journal article supplement (doi:10.1186/s12879-024-09261-9), 1969-01-01
Supplement: MOESM2 [file 26955898]

## Additional file 2

**Table S2: Oligonucleotide primers and probes used in SYBR Green real time PCR:**

| Gene            | Primer sequence<br>(5'-3')  | Reference |
|-----------------|-----------------------------|-----------|
| <i>blaZ</i>     | F TACAACCTGTAATATCGGAGGG    | [14]      |
|                 | R CATTACACTCTTGGCGGTTC      |           |
| <i>16S rRNA</i> | F CCTATAAGACTGGGATAACTTCGGG | [19]      |
|                 | R CTTTGAGTTTCAACCTTGCGGTCG  |           |
