# Supplementary material for: THE EFFECTS OF POLARIZATION ON DIFFUSION DESCRIPTIONS OF RADIATIVE TRANSFER.
Source: Springer Nature journal article supplement (doi:10.1186/s12879-024-09261-9), 1969-01-01
Supplement: MOESM4 [file 26955898]

## Additional file 4

**Fig. S2**

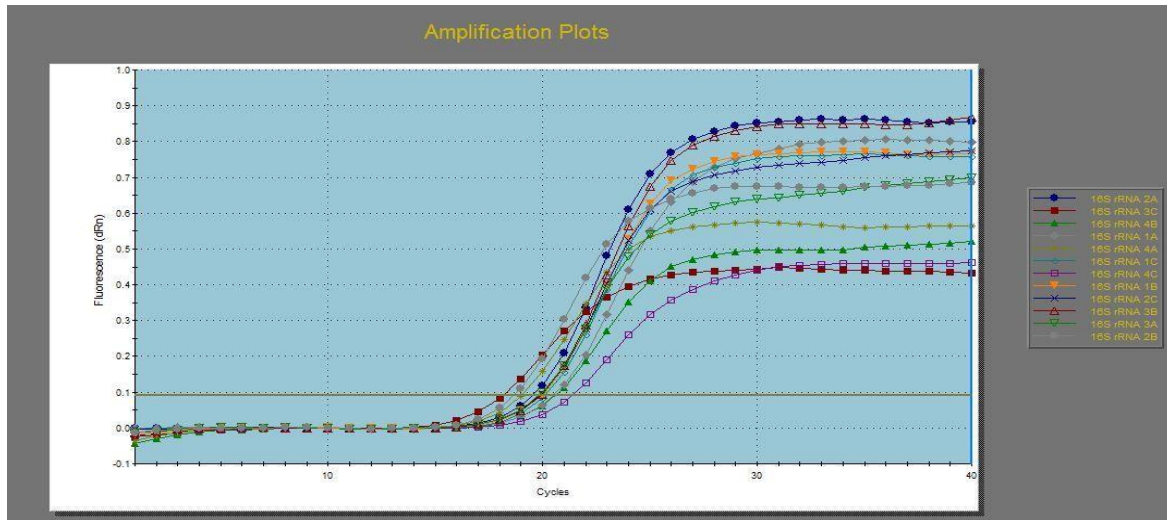

**Amplification curve of 16s rRNA**
