# Supplementary material for: THE EFFECTS OF POLARIZATION ON DIFFUSION DESCRIPTIONS OF RADIATIVE TRANSFER.
Source: Springer Nature journal article supplement (doi:10.1186/s12879-024-09261-9), 1969-01-01
Supplement: MOESM5 [file 26955898]

**Additional file 5**

**Fig.S3**

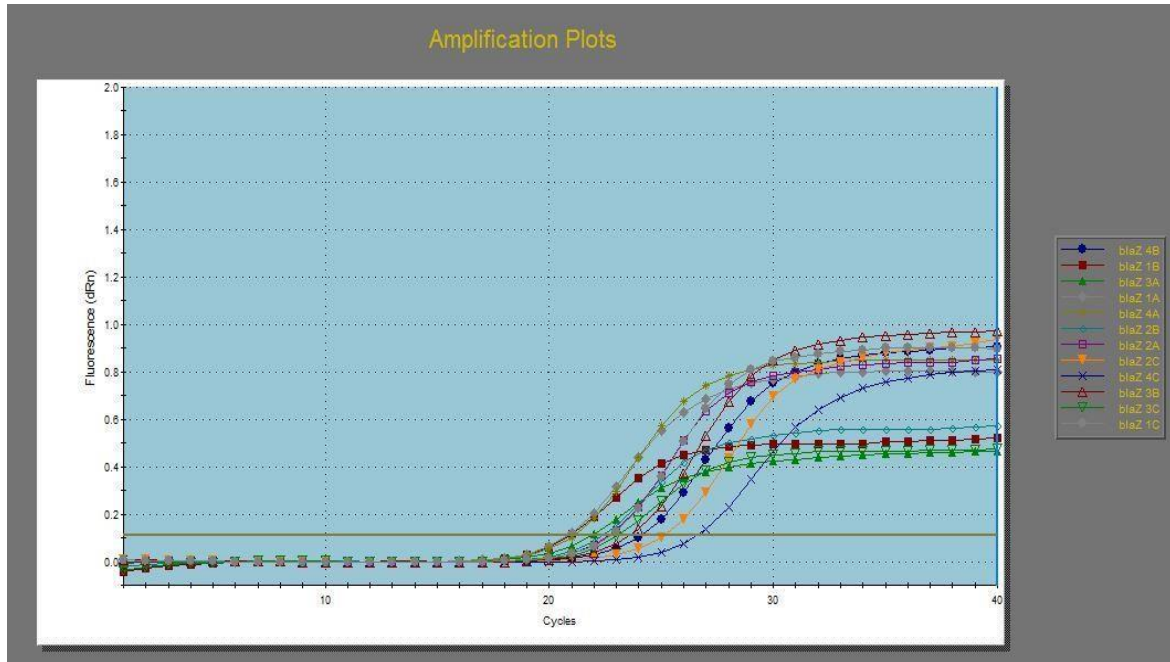

**Amplification curve of *blaZ* gene**
